# Supplementary material for: Different Genes Interact with Particulate Matter and Tobacco Smoke Exposure in Affecting Lung Function Decline in the General Population
Source: PLoS One. 2012 Jul 6;7(7):e40175. doi: 10.1371/journal.pone.0040175 (PMC3391223; doi:10.1371/journal.pone.0040175)
Supplement: Table S1 — Characteristics of selected oxidative-stress related genes and mapping to candidate pathways. (XLS) [file pone.0040175.s003.xls]

## Sheet: Tab1_final
Table S1 Characteristics of selected oxidative-stress related genes and mapping to candidate pathways.
GENE	LOCATION, SIZE & COVERAGE							PATHWAYS
Gene	Chromosome	Gene region start end		size (kb)	Number of SNPs	Average spacing between SNPs (kB)	Number of pathway mappings	Apoptosis Signaling	Arachidonic Acid Metabolism	Aryl Hydrocarbon Receptor Signaling	Metabolism of Xenobiotics by Cytochrome P450	fMLP Signaling in Neutrophils	Glutathione Metabolism	IL-6 Signaling	Methane Metabolism	Mitochondrial Dysfunction	NF-κB Signaling	Production of Nitric Oxide and Reactive Oxygen Species in Macrophages	NRF2-mediated Oxidative Stress Response	Oxidative Phosphorylation	Xenobiotic Metabolism Signaling
PARK7	1	7924300	7987929	63.629	20	3.18145	1									X
AKR7A3	1	19461643	19507867	46.224	22	2.10109	1												X
AKR7A2	1	19483048	19531227	48.179	24	2.00746	1												X
PRDX1	1	45729293	45780196	50.903	22	2.31377	2								X				X
AKR1A1	1	45769084	45828308	59.224	21	2.82019	2				X								X
GPX7	1	52820630	52867311	46.681	31	1.50584	3		X				X			X
DHCR24	1	55067887	55145509	77.622	78	0.995154	0
JUN	1	58999050	59042373	43.323	20	2.16615	4			X				X				X	X
GCLM	1	94105177	94167600	62.423	25	2.49692	2						X						X
GSTM4	1	109980220	110025854	45.634	23	1.98409	5			X	X		X						X		X
GSTM2	1	109992166	110039431	47.265	21	2.25071	5			X	X		X						X		X
GSTM1	1	110011940	110057890	45.95	20	2.2975	5			X	X		X						X		X
GSTM5	1	110036386	110082414	46.028	29	1.58717	5			X	X		X						X		X
GSTM3	1	110058076	110105183	47.107	33	1.42748	5			X	X		X						X		X
TXNIP	1	144129818	144173985	44.167	8	5.52088	0
ARNT	1	149028804	149135868	107.064	27	3.96533	2			X											X
NDUFS2	1	159415728	159470808	55.08	36	1.53	2									X				X
MGST3	1	163847073	163911479	64.406	100	0.64406	6		X	X	X		X						X		X
FMO2	1	169401011	169468446	67.435	71	0.949789	1														X
PRDX6	1	171693108	171744569	51.461	24	2.14421	3		X				X		X
NCF2	1	181771319	181846362	75.043	54	1.38969	2					X						X
PTGS2	1	184887566	184936182	48.616	34	1.42988	1		X
PLA2G4A	1	185044654	185244736	200.082	122	1.64002	1		X
GLRX2	1	191312222	191361179	48.957	19	2.57668	1									X
EPHX1	1	224044419	224119885	75.466	54	1.39752	2				X								X
AGT	1	228884891	228936959	52.068	95	0.548084	0
TPO	2	1376239	1545506	169.267	229	0.739157	1								X
PXDN	2	1594665	1747298	152.633	137	1.11411	0
NFE2L2	2	177783278	177856863	73.585	37	1.98878	3			X									X		X
STAT1	2	191522006	191607221	85.215	62	1.37444	1											X
AOX1	2	201138975	201264462	125.487	118	1.06345	1												X
NDUFS1	2	206676047	206752432	76.385	37	2.06446	2									X				X
IDH1	2	208789197	208848051	58.854	26	2.26362	1						X
STK25	2	242063104	242116707	53.603	28	1.91439	0
OGG1	3	9746627	9794089	47.462	24	1.97758	0
TGFBR2	3	30602997	30730637	127.64	152	0.839737	1										X
GPX1	3	49349612	49390795	41.183	12	3.43192	2		X				X
AGTR1	3	149878347	149963480	85.133	86	0.989919	0
CP	3	150352979	150442522	89.543	66	1.35671	0
SOD3	4	24386182	24431565	45.383	23	1.97317	2												X		X
SNCA	4	90844272	90997373	153.101	179	0.855313	1									X
NFKB1	4	103621517	103777507	155.99	135	1.15548	7	X		X		X		X			X	X			X
GSTCD	4	106829389	107008331	178.942	105	1.70421	0
CASP6	4	110809233	110864078	54.845	24	2.28521	1	X
MGST2	4	140786371	140864856	78.485	81	0.968951	6		X	X	X		X						X		X
SEPP1	5	42815738	42867781	52.043	47	1.1073	0
NDUFS4	5	52872221	53034928	162.707	133	1.22336	2									X				X
GPX8	5	54471740	54518886	47.146	44	1.0715	2		X				X
GLRX	5	95155308	95204333	49.025	53	0.925	1						X
GPX3	5	150360191	150408747	48.556	74	0.656162	2		X				X
ATOX1	5	151082575	151138403	55.828	25	2.23312	0
DUSP1	5	172107697	172150809	43.112	35	1.23177	0
NQO2	6	2925065	2984993	59.928	68	0.881294	3			X									X		X
RIPK1	6	3002056	3080420	78.364	20	3.9182	1										X
GPX6	6	28559051	28611549	52.498	26	2.01915	2		X				X
GPX5	6	28581767	28630707	48.94	25	1.9576	2		X				X
MAPK14	6	36083431	36206991	123.56	80	1.5445	4							X				X	X		X
CDKN1A	6	36732214	36783095	50.881	72	0.706681	1			X
CRISP2	6	49748030	49809258	61.228	60	1.02047	0
GCLC	6	53450098	53537886	87.788	87	1.00906	3						X						X		X
NOX3	6	155738193	155838729	100.536	106	0.948453	1					X
SOD2	6	160000138	160054343	54.205	18	3.01139	2									X			X
PARK2	6	161668579	163088824	1420.24	1724	0.823808	1									X
RAC1	7	6360650	6430123	69.473	45	1.54384	3					X					X	X
EGFR	7	55034218	55262525	228.307	242	0.943417	1										X
GSTK1	7	142650643	142696344	45.701	5	9.1402	6		X	X	X		X						X		X
NOS3	7	150299076	150362620	63.544	29	2.19117	0
MSRA	8	9929239	10343811	414.572	691	0.599959	0
PTK2B	8	27204915	27392820	187.905	232	0.809935	0
EPHX2	8	27384561	27478403	93.842	87	1.07864	1		X
SCARA3	8	27527495	27606456	78.961	111	0.71136	0
GSR	8	30635119	30725028	89.909	33	2.72452	3						X			X			X
PPP2CB	8	30742667	30809894	67.227	30	2.2409	2											X			X
OXR1	8	107331581	107854097	522.516	518	1.00872	0
NAPRT1	8	144708097	144751656	43.559	33	1.31997	0
JAK2	9	4955244	5138183	182.939	117	1.56358	2							X				X
TXN	9	112026130	112078599	52.469	50	1.04938	1												X
TLR4	9	119486280	119539587	53.307	56	0.951911	2										X	X
PTGS1	9	124153049	124217802	64.753	48	1.34902	1		X
CDK1	10	62188094	62236833	48.739	68	0.71675	1	X
CHUK	10	101918113	101999334	81.221	28	2.90075	4	X						X			X	X
GSTO1	10	105983941	106037213	53.272	23	2.31617	5			X	X		X						X		X
GSTO2	10	105998620	106069166	70.546	27	2.61281	5			X	X		X						X		X
PRDX3	10	120897204	120948335	51.131	27	1.89374	1									X
GLRX3	10	131804652	131887860	83.208	108	0.770444	0
CAT	11	34397047	34470183	73.136	126	0.580444	5								X	X		X	X		X
NDUFS3	11	47537137	47582691	45.554	5	9.1108	2									X				X
PRDX5	11	63822144	63865859	43.715	13	3.36269	2								X	X
RELA	11	65157642	65207019	49.377	14	3.52693	7	X		X		X		X			X	X			X
FOSL1	11	65396267	65444573	48.306	14	3.45043	1												X
GSTP1	11	67087641	67130700	43.059	31	1.389	5			X	X		X						X		X
NDUFS8	11	67534659	67580690	46.031	27	1.70485	2									X				X
UCP2	11	73343363	73391537	48.174	40	1.20435	1									X
NOX4	11	88677169	88884301	207.132	153	1.3538	1					X
MGST1	12	16371342	16428611	57.269	68	0.842191	5			X	X		X						X		X
NDUFA12	12	93869240	93941642	72.402	112	0.646446	2									X				X
TXNRD1	12	103113688	103288192	174.504	118	1.47885	1												X
NOS1	12	116113159	116303990	190.831	165	1.15655	0
PSMB5	14	22544899	22594269	49.37	22	2.24409	0
DHRS2	14	23155412	23204688	49.276	44	1.11991	2		X		X
GPX2	14	64455624	64499284	43.66	45	0.970222	3		X				X						X
PSEN1	14	72652895	72780152	127.257	62	2.05253	1									X
FOS	14	74795233	74838690	43.457	20	2.17285	4			X				X				X	X
GSTZ1	14	76836982	76887693	50.711	42	1.2074	3		X		X		X
GLRX5	14	95051075	95100808	49.733	81	0.613988	0
MAP2K1	15	64446264	64590936	144.672	92	1.57252	6	X				X		X				X	X		X
NOX5	15	66989892	67156555	166.663	22	7.57559	0
CYP1A1	15	72778935	72824930	45.995	9	5.11056	4		X	X	X										X
CYP1A2	15	72808236	72855994	47.758	15	3.18387	4		X	X	X										X
NOXO1	16	1948918	1991441	42.523	21	2.0249	0
HMOX2	16	4444719	4520349	75.63	34	2.22441	0
ABCC1	16	15930934	16164431	233.497	244	0.956955	1												X
MT2A	16	55179978	55220910	40.932	23	1.77965	0
NQO1	16	68280804	68338034	57.23	33	1.73424	3			X									X		X
HP	16	70626008	70672456	46.448	17	2.73224	0
CYBA	16	87217197	87264958	47.761	25	1.91044	1											X
ALOX12	17	6820107	6874779	54.672	33	1.65673	1		X
TP53	17	7492444	7551588	59.144	20	2.9572	2	X		X
NOS2	17	23087918	23171682	83.764	69	1.21397	2											X			X
CCL5	17	31202608	31251490	48.882	17	2.87541	0
AATF	17	32360287	32508284	147.997	50	2.95994	0
COL1A1	17	45596455	45653999	57.544	38	1.51432	1							X
EPX	17	53605087	53657534	52.447	36	1.45686	1								X
LPO	17	53650785	53720878	70.093	29	2.417	1								X
MPO	17	53682215	53733295	51.08	32	1.59625	2								X			X
PRKCA	17	61709387	62257324	547.937	533	1.02802	5	X				X						X	X		X
GRB2	17	70805751	70933384	127.633	71	1.79765	1							X
CYGB	17	72015034	72065377	50.343	24	2.09763	0
PYCR1	17	77463557	77508259	44.702	1	44.702	0
BCL2	18	58921558	59157593	236.035	210	1.12398	1	X
GPX4	19	1034935	1077787	42.852	34	1.26035	3		X				X			X
INSR	19	7043265	7265011	221.746	153	1.44932	1										X
KEAP1	19	10437795	10494481	56.686	21	2.69933	2												X		X
PRDX2	19	12748633	12793694	45.061	8	5.63262	1								X
NDUFA13	19	19468018	19520013	51.995	28	1.85696	2									X				X
ERCC1	19	50582430	50639017	56.587	16	3.53669	0
PNKP	19	55036271	55082634	46.363	23	2.01578	0
SRXN1	20	555267	601890	46.623	22	2.11923	0
SLC23A2	20	4761001	4950145	189.144	144	1.3135	0
PLCB1	20	8041295	8833547	792.252	937	0.84552	1					X
BCL2L1	20	29695921	29794317	98.396	60	1.63993	1	X
GSS	20	32959896	33027262	67.366	38	1.77279	1						X
PLCG1	20	39179574	39257771	78.197	27	2.89619	2	X										X
SOD1	21	31933805	31983114	49.309	17	2.90053	1												X
TXNRD2	22	18223039	18329359	106.32	92	1.15565	1									X
GSTT2	22	22609600	22653393	43.793	17	2.57606	5			X	X		X						X		X
GSTT1	22	22686138	22734284	48.146	3	16.0487	6		X	X	X		X						X		X
HMOX1	22	34087059	34140207	53.148	39	1.36277	2												X		X
TXN2	22	35173038	35227633	54.595	64	0.853047	1									X
RAC2	22	35931255	35990251	58.996	68	0.867588	2										X	X
EP300	22	39798559	39926027	127.468	48	2.65558	4			X							X		X		X
NDUFA6	22	40791475	40836834	45.359	21	2.15995	2									X				X

## Sheet: Tabelle1
GENES	Apoptosis Signaling	Arachidonic Acid Metabolism	Aryl Hydrocarbon Receptor Signaling	Metabolism of Xenobiotics by Cytochrome P450	fMLP Signaling in Neutrophils	Glutathione Metabolism	IL-6 Signaling	Methane Metabolism	Mitochondrial Dysfunction	NF-κB Signaling	Production of Nitric Oxide and Reactive Oxygen Species in Macrophages	NRF2-mediated Oxidative Stress Response	Oxidative Phosphorylation	Xenobiotic Metabolism Signaling
AATF	BCL2	ALOX12	ARNT	AKR1A1	MAP2K1	GCLC	CHUK	CAT	CAT	CHUK	CAT	ABCC1	NDUFA12	ARNT
ABCC1	BCL2L1	CYP1A1	CDKN1A	CYP1A1	NCF2	GCLM	COL1A1	EPX	GLRX2	EGFR	CHUK	AKR1A1	NDUFA13	CAT
AGT	CASP6	CYP1A2	CYP1A1	CYP1A2	NFKB1	GLRX	FOS	LPO	GPX4	EP300	CYBA	AKR7A2	NDUFA6	CYP1A1
AGTR1	CDK1	DHRS2	CYP1A2	DHRS2	NOX3	GPX1	GRB2	MPO	GPX7	INSR	FOS	AKR7A3	NDUFS1	CYP1A2
AKR1A1	CHUK	EPHX2	EP300	EPHX1	NOX4	GPX2	JAK2	PRDX1	GSR	NFKB1	JAK2	AOX1	NDUFS2	EP300
AKR7A2	MAP2K1	GPX1	FOS	GSTK1	PLCB1	GPX3	JUN	PRDX2	NDUFA12	RAC1	JUN	CAT	NDUFS3	FMO2
AKR7A3	NFKB1	GPX2	GSTK1	GSTM1	PRKCA	GPX4	MAP2K1	PRDX5	NDUFA13	RAC2	MAP2K1	EP300	NDUFS4	GCLC
ALOX12	PLCG1	GPX3	GSTM1	GSTM2	RAC1	GPX5	MAPK14	PRDX6	NDUFA6	RELA	MAPK14	EPHX1	NDUFS8	GSTK1
AOX1	PRKCA	GPX4	GSTM2	GSTM3	RELA	GPX6	NFKB1	TPO	NDUFS1	RIPK1	MPO	FOS		GSTM1
ARNT	RELA	GPX5	GSTM3	GSTM4		GPX7	RELA		NDUFS2	TGFBR2	NCF2	FOSL1		GSTM2
ATOX1	TP53	GPX6	GSTM4	GSTM5		GPX8			NDUFS3	TLR4	NFKB1	GCLC		GSTM3
BCL2		GPX7	GSTM5	GSTO1		GSR			NDUFS4		NOS2	GCLM		GSTM4
BCL2L1		GPX8	GSTO1	GSTO2		GSS			NDUFS8		PLCG1	GPX2		GSTM5
CASP6		GSTK1	GSTO2	GSTP1		GSTK1			PARK2		PPP2CB	GSR		GSTO1
CAT		GSTT1	GSTP1	GSTT1		GSTM1			PARK7		PRKCA	GSTK1		GSTO2
CCL5		GSTZ1	GSTT1	GSTT2		GSTM2			PRDX3		RAC1	GSTM1		GSTP1
CDK1		MGST2	GSTT2	GSTZ1		GSTM3			PRDX5		RAC2	GSTM2		GSTT1
CDKN1A		MGST3	JUN	MGST1		GSTM4			PSEN1		RELA	GSTM3		GSTT2
CHUK		PLA2G4A	MGST1	MGST2		GSTM5			SNCA		STAT1	GSTM4		HMOX1
COL1A1		PRDX6	MGST2	MGST3		GSTO1			SOD2		TLR4	GSTM5		KEAP1
CP		PTGS1	MGST3			GSTO2			TXN2			GSTO1		MAP2K1
CRISP2		PTGS2	NFE2L2			GSTP1			TXNRD2			GSTO2		MAPK14
CYBA			NFKB1			GSTT1			UCP2			GSTP1		MGST1
CYGB			NQO1			GSTT2						GSTT1		MGST2
CYP1A1			NQO2			GSTZ1						GSTT2		MGST3
CYP1A2			RELA			IDH1						HMOX1		NFE2L2
DHCR24			TP53			MGST1						JUN		NFKB1
DHRS2						MGST2						KEAP1		NOS2
DUSP1						MGST3						MAP2K1		NQO1
EGFR						PRDX6						MAPK14		NQO2
EP300												MGST1		PPP2CB
EPHX1												MGST2		PRKCA
EPHX2												MGST3		RELA
EPX												NFE2L2		SOD3
ERCC1												NQO1
FMO2												NQO2
FOS												PRDX1
FOSL1												PRKCA
GCLC												SOD1
GCLM												SOD2
GLRX												SOD3
GLRX2												TXN
GLRX3												TXNRD1
GLRX5
GPX1
GPX2
GPX3
GPX4
GPX5
GPX6
GPX7
GPX8
GRB2
GSR
GSS
GSTCD
GSTK1
GSTM1
GSTM2
GSTM3
GSTM4
GSTM5
GSTO1
GSTO2
GSTP1
GSTT1
GSTT2
GSTZ1
HMOX1
HMOX2
HP
IDH1
INSR
JAK2
JUN
KEAP1
LPO
MAP2K1
MAPK14
MGST1
MGST2
MGST3
MPO
MSRA
MT2A
NAPRT1
NCF2
NDUFA12
NDUFA13
NDUFA6
NDUFS1
NDUFS2
NDUFS3
NDUFS4
NDUFS8
NFE2L2
NFKB1
NOS1
NOS2
NOS3
NOX3
NOX4
NOX5
NOXO1
NQO1
NQO2
OGG1
OXR1
PARK2
PARK7
PLA2G4A
PLCB1
PLCG1
PNKP
PPP2CB
PRDX1
PRDX2
PRDX3
PRDX5
PRDX6
PRKCA
PSEN1
PSMB5
PTGS1
PTGS2
PTK2B
PXDN
PYCR1
RAC1
RAC2
RELA
RIPK1
SCARA3
SEPP1
SLC23A2
SNCA
SOD1
SOD2
SOD3
SRXN1
STAT1
STK25
TGFBR2
TLR4
TP53
TPO
TXN
TXN2
TXNIP
TXNRD1
TXNRD2
UCP2

## Sheet: Tab1_reordered
GENES	Apoptosis Signaling	Arachidonic Acid Metabolism	Aryl Hydrocarbon Receptor Signaling	Metabolism of Xenobiotics by Cytochrome P450	fMLP Signaling in Neutrophils	Glutathione Metabolism	IL-6 Signaling	Methane Metabolism	Mitochondrial Dysfunction	NF-κB Signaling	Production of Nitric Oxide and Reactive Oxygen Species in Macrophages	NRF2-mediated Oxidative Stress Response	Oxidative Phosphorylation	Xenobiotic Metabolism Signaling
AATF
ABCC1												ABCC1
AGT
AGTR1
AKR1A1				AKR1A1								AKR1A1
AKR7A2												AKR7A2
AKR7A3												AKR7A3
ALOX12		ALOX12
AOX1												AOX1
ARNT			ARNT											ARNT
ATOX1
BCL2	BCL2
BCL2L1	BCL2L1
CASP6	CASP6
CAT								CAT	CAT		CAT	CAT		CAT
CCL5
CDK1	CDK1
CDKN1A			CDKN1A
CHUK	CHUK						CHUK			CHUK	CHUK
COL1A1							COL1A1
CP
CRISP2
CYBA											CYBA
CYGB
CYP1A1		CYP1A1	CYP1A1	CYP1A1										CYP1A1
CYP1A2		CYP1A2	CYP1A2	CYP1A2										CYP1A2
DHCR24
DHRS2		DHRS2		DHRS2
DUSP1
EGFR										EGFR
EP300			EP300							EP300		EP300		EP300
EPHX1				EPHX1								EPHX1
EPHX2		EPHX2
EPX								EPX
ERCC1
FMO2														FMO2
FOS			FOS				FOS				FOS	FOS
FOSL1												FOSL1
GCLC						GCLC						GCLC		GCLC
GCLM						GCLM						GCLM
GLRX						GLRX
GLRX2									GLRX2
GLRX3
GLRX5
GPX1		GPX1				GPX1
GPX2		GPX2				GPX2						GPX2
GPX3		GPX3				GPX3
GPX4		GPX4				GPX4			GPX4
GPX5		GPX5				GPX5
GPX6		GPX6				GPX6
GPX7		GPX7				GPX7			GPX7
GPX8		GPX8				GPX8
GRB2							GRB2
GSR						GSR			GSR			GSR
GSS						GSS
GSTCD
GSTK1		GSTK1	GSTK1	GSTK1		GSTK1						GSTK1		GSTK1
GSTM1			GSTM1	GSTM1		GSTM1						GSTM1		GSTM1
GSTM2			GSTM2	GSTM2		GSTM2						GSTM2		GSTM2
GSTM3			GSTM3	GSTM3		GSTM3						GSTM3		GSTM3
GSTM4			GSTM4	GSTM4		GSTM4						GSTM4		GSTM4
GSTM5			GSTM5	GSTM5		GSTM5						GSTM5		GSTM5
GSTO1			GSTO1	GSTO1		GSTO1						GSTO1		GSTO1
GSTO2			GSTO2	GSTO2		GSTO2						GSTO2		GSTO2
GSTP1			GSTP1	GSTP1		GSTP1						GSTP1		GSTP1
GSTT1		GSTT1	GSTT1	GSTT1		GSTT1						GSTT1		GSTT1
GSTT2			GSTT2	GSTT2		GSTT2						GSTT2		GSTT2
GSTZ1		GSTZ1		GSTZ1		GSTZ1
HMOX1												HMOX1		HMOX1
HMOX2
HP
IDH1						IDH1
INSR										INSR
JAK2							JAK2				JAK2
JUN			JUN				JUN				JUN	JUN
KEAP1												KEAP1		KEAP1
LPO								LPO
MAP2K1	MAP2K1				MAP2K1		MAP2K1				MAP2K1	MAP2K1		MAP2K1
MAPK14							MAPK14				MAPK14	MAPK14		MAPK14
MGST1			MGST1	MGST1		MGST1						MGST1		MGST1
MGST2		MGST2	MGST2	MGST2		MGST2						MGST2		MGST2
MGST3		MGST3	MGST3	MGST3		MGST3						MGST3		MGST3
MPO								MPO			MPO
MSRA
MT2A
NAPRT1
NCF2					NCF2						NCF2
NDUFA12									NDUFA12				NDUFA12
NDUFA13									NDUFA13				NDUFA13
NDUFA6									NDUFA6				NDUFA6
NDUFS1									NDUFS1				NDUFS1
NDUFS2									NDUFS2				NDUFS2
NDUFS3									NDUFS3				NDUFS3
NDUFS4									NDUFS4				NDUFS4
NDUFS8									NDUFS8				NDUFS8
NFE2L2			NFE2L2									NFE2L2		NFE2L2
NFKB1	NFKB1		NFKB1		NFKB1		NFKB1			NFKB1	NFKB1			NFKB1
NOS1
NOS2											NOS2			NOS2
NOS3
NOX3					NOX3
NOX4					NOX4
NOX5
NOXO1
NQO1			NQO1									NQO1		NQO1
NQO2			NQO2									NQO2		NQO2
OGG1
OXR1
PARK2									PARK2
PARK7									PARK7
PLA2G4A		PLA2G4A
PLCB1					PLCB1
PLCG1	PLCG1										PLCG1
PNKP
PPP2CB											PPP2CB			PPP2CB
PRDX1								PRDX1				PRDX1
PRDX2								PRDX2
PRDX3									PRDX3
PRDX5								PRDX5	PRDX5
PRDX6		PRDX6				PRDX6		PRDX6
PRKCA	PRKCA				PRKCA						PRKCA	PRKCA		PRKCA
PSEN1									PSEN1
PSMB5
PTGS1		PTGS1
PTGS2		PTGS2
PTK2B
PXDN
PYCR1
RAC1					RAC1					RAC1	RAC1
RAC2										RAC2	RAC2
RELA	RELA		RELA		RELA		RELA			RELA	RELA			RELA
RIPK1										RIPK1
SCARA3
SEPP1
SLC23A2
SNCA									SNCA
SOD1												SOD1
SOD2									SOD2			SOD2
SOD3												SOD3		SOD3
SRXN1
STAT1											STAT1
STK25
TGFBR2										TGFBR2
TLR4										TLR4	TLR4
TP53	TP53		TP53
TPO								TPO
TXN												TXN
TXN2									TXN2
TXNIP
TXNRD1												TXNRD1
TXNRD2									TXNRD2
UCP2									UCP2

## Sheet: Tab1_reordered2
GENES	Apoptosis Signaling	Arachidonic Acid Metabolism	Aryl Hydrocarbon Receptor Signaling	Metabolism of Xenobiotics by Cytochrome P450	fMLP Signaling in Neutrophils	Glutathione Metabolism	IL-6 Signaling	Methane Metabolism	Mitochondrial Dysfunction	NF-κB Signaling	Production of Nitric Oxide and Reactive Oxygen Species in Macrophages	NRF2-mediated Oxidative Stress Response	Oxidative Phosphorylation	Xenobiotic Metabolism Signaling	Number of mappings to pathways
AATF															0
ABCC1												X			1
AGT															0
AGTR1															0
AKR1A1				X								X			2
AKR7A2												X			1
AKR7A3												X			1
ALOX12		X													1
AOX1												X			1
ARNT			X											X	2
ATOX1															0
BCL2	X														1
BCL2L1	X														1
CASP6	X														1
CAT								X	X		X	X		X	5
CCL5															0
CDK1	X														1
CDKN1A			X												1
CHUK	X						X			X	X				4
COL1A1							X								1
CP															0
CRISP2															0
CYBA											X				1
CYGB															0
CYP1A1		X	X	X										X	4
CYP1A2		X	X	X										X	4
DHCR24															0
DHRS2		X		X											2
DUSP1															0
EGFR										X					1
EP300			X							X		X		X	4
EPHX1				X								X			2
EPHX2		X													1
EPX								X							1
ERCC1															0
FMO2														X	1
FOS			X				X				X	X			4
FOSL1												X			1
GCLC						X						X		X	3
GCLM						X						X			2
GLRX						X									1
GLRX2									X						1
GLRX3															0
GLRX5															0
GPX1		X				X									2
GPX2		X				X						X			3
GPX3		X				X									2
GPX4		X				X			X						3
GPX5		X				X									2
GPX6		X				X									2
GPX7		X				X			X						3
GPX8		X				X									2
GRB2							X								1
GSR						X			X			X			3
GSS						X									1
GSTCD															0
GSTK1		X	X	X		X						X		X	6
GSTM1			X	X		X						X		X	5
GSTM2			X	X		X						X		X	5
GSTM3			X	X		X						X		X	5
GSTM4			X	X		X						X		X	5
GSTM5			X	X		X						X		X	5
GSTO1			X	X		X						X		X	5
GSTO2			X	X		X						X		X	5
GSTP1			X	X		X						X		X	5
GSTT1		X	X	X		X						X		X	6
GSTT2			X	X		X						X		X	5
GSTZ1		X		X		X									3
HMOX1												X		X	2
HMOX2															0
HP															0
IDH1						X									1
INSR										X					1
JAK2							X				X				2
JUN			X				X				X	X			4
KEAP1												X		X	2
LPO								X							1
MAP2K1	X				X		X				X	X		X	6
MAPK14							X				X	X		X	4
MGST1			X	X		X						X		X	5
MGST2		X	X	X		X						X		X	6
MGST3		X	X	X		X						X		X	6
MPO								X			X				2
MSRA															0
MT2A															0
NAPRT1															0
NCF2					X						X				2
NDUFA12									X				X		2
NDUFA13									X				X		2
NDUFA6									X				X		2
NDUFS1									X				X		2
NDUFS2									X				X		2
NDUFS3									X				X		2
NDUFS4									X				X		2
NDUFS8									X				X		2
NFE2L2			X									X		X	3
NFKB1	X		X		X		X			X	X			X	7
NOS1															0
NOS2											X			X	2
NOS3															0
NOX3					X										1
NOX4					X										1
NOX5															0
NOXO1															0
NQO1			X									X		X	3
NQO2			X									X		X	3
OGG1															0
OXR1															0
PARK2									X						1
PARK7									X						1
PLA2G4A		X													1
PLCB1					X										1
PLCG1	X										X				2
PNKP															0
PPP2CB											X			X	2
PRDX1								X				X			2
PRDX2								X							1
PRDX3									X						1
PRDX5								X	X						2
PRDX6		X				X		X							3
PRKCA	X				X						X	X		X	5
PSEN1									X						1
PSMB5															0
PTGS1		X													1
PTGS2		X													1
PTK2B															0
PXDN															0
PYCR1															0
RAC1					X					X	X				3
RAC2										X	X				2
RELA	X		X		X		X			X	X			X	7
RIPK1										X					1
SCARA3															0
SEPP1															0
SLC23A2															0
SNCA									X						1
SOD1												X			1
SOD2									X			X			2
SOD3												X		X	2
SRXN1															0
STAT1											X				1
STK25															0
TGFBR2										X					1
TLR4										X	X				2
TP53	X		X												2
TPO								X							1
TXN												X			1
TXN2									X						1
TXNIP															0
TXNRD1												X			1
TXNRD2									X						1
UCP2									X						1

## Sheet: Tabelle2
glutathione	GPX2	GSTM5	GCLC	IDH1	GSTO2	GPX6	GSTT1	GLRX	GSTM1	GSTK1	GSTM4	GPX7	GSTO1	GPX8	GPX3	MGST3	PRDX6	GPX1	GSTP1	GSTM3	GPX4	MGST2	GPX5		GSR	MGST1	GSTZ1	GSTT2	GCLM	GSTM2	GSS
mitodysf		PARK2	SNCA	GLRX2	NDUFS4	NDUFA12	CAT	NDUFS2	NDUFS3	GPX7	UCP2	PRDX3	TXNRD2	PRDX5	NDUFS8	NDUFA6	PARK7	GPX4	TXN2	NDUFS1	GSR	SOD2	NDUFA13	PSEN1
nrf2	GPX2	GSTM5	SOD3	GCLC	GSTO2	EP300	ABCC1	HMOX1	TXNRD1	GSTM1	PRKCA	GSTT1	FOS	GSTK1	MAPK14	GSTM4	CAT	AKR7A2	EPHX1	AKR7A3	GSTO1	NQO1	FOSL1	TXN	AKR1A1	MGST3	SOD1	PRDX1	KEAP1	GSTM3	GSTP1	MGST2	NQO2	AOX1	GSR	SOD2	JUN	MGST1	NFE2L2	MAP2K1	GSTT2	GCLM	GSTM2
arachido	GPX2	CYP1A1	PTGS2	MGST3	PRDX6	PTGS1	GPX1	CYP1A2	EPHX2	GPX4	GPX6	MGST2	GPX5	GSTT1	ALOX12	GSTK1	PLA2G4A	GSTZ1	GPX7	DHRS2	GPX8	GPX3
methane	PRDX2	PRDX5	PRDX6	MPO	CAT	LPO	PRDX1	TPO	EPX
norosmacro		RAC1	RELA	JAK2	TLR4	NFKB1	NOS2	RAC2	PRKCA	PLCG1	FOS	CYBA	STAT1	MAPK14	JUN	PPP2CB	CHUK	CAT	MPO	MAP2K1	NCF2
aryl	GSTM5	CYP1A1	RELA	GSTO2	EP300	CDKN1A	NFKB1	GSTT1	GSTM1	GSTK1	FOS	GSTM4	ARNT	GSTO1	NQO1	MGST3	TP53	CYP1A2	GSTP1	GSTM3	NQO2	MGST2	JUN	MGST1	NFE2L2	GSTT2	GSTM2
xenobiot	GSTM5	CYP1A1	SOD3	GCLC	RELA	GSTO2	EP300	HMOX1	NFKB1	NOS2	GSTT1	PRKCA	GSTM1	GSTK1	MAPK14	ARNT	GSTM4	PPP2CB	CAT	GSTO1	NQO1	MGST3	KEAP1	CYP1A2	GSTM3	GSTP1	MGST2	NQO2	MGST1	MAP2K1	NFE2L2	FMO2	GSTT2	GSTM2
oxphosphor		NDUFS8	NDUFA6	NDUFS4	NDUFS1	NDUFA12	NDUFA13	NDUFS2	NDUFS3
cytp450	GSTM5	CYP1A1	AKR1A1	MGST3	GSTO2	CYP1A2	GSTP1	GSTM3	MGST2	GSTM1	GSTT1	GSTK1	GSTM4	MGST1	EPHX1	GSTZ1	GSTT2	GSTO1	DHRS2	GSTM2
apoptosis	PRKCA	PLCG1	BCL2L1	BCL2	CHUK	RELA	MAP2K1	CASP6	TP53	CDK1	NFKB1
il6sign	GRB2	FOS	JUN	MAPK14	CHUK	JAK2	RELA	MAP2K1	COL1A1	NFKB1
tlrsign	FOS	JUN	MAPK14	CHUK	RELA	TLR4	NFKB1
nfkbsign	RIPK1	TGFBR2	RAC1	CHUK	RELA	TLR4	EP300	EGFR	NFKB1	INSR	RAC2
fMLPSignNeutro	PRKCA	PLCB1			RAC1	RELA	MAP2K1	NCF2	NOX3	NOX4	NFKB1
