# Supplementary material for: Different Genes Interact with Particulate Matter and Tobacco Smoke Exposure in Affecting Lung Function Decline in the General Population
Source: PLoS One. 2012 Jul 6;7(7):e40175. doi: 10.1371/journal.pone.0040175 (PMC3391223; doi:10.1371/journal.pone.0040175)
Supplement: Table S2 — Comparison of study sample to non-asthmatic participants lost to follow-up, and those followed-up w/o genome-wide data. PA-C p-value for comparisons of characteristics between baseline and analysis sample; PB-C p-value for comparisons of characteristics between follow-up and analysis sample; a Chi-squared tests for proportions, two sample T-tests for means, and ranksum-test for medians, b n = 650 with complete baseline and follow-up data, c in ever-smokers only. (XLS) [file pone.0040175.s004.xls]

## Sheet: Sheet1
Table S2 Comparison of study sample to non-asthmatic participants lost to follow-up,
and those followed-up w/o genome-wide data
	A) BASELINE					B) FOLLOWED-UP,					C) ANALYSIS
	ONLY n=1299					NO GWA n=3833					SAMPLE n=669					PA-Ca	PB-Ca
BASELINE CHARACTERISTICS
female (%)	45.8					53.8					51.9					0.011	0.35
age (yrs) [mean/sd]	40.3	/	12.1			41.4	/	11.4			42.1	/	10.8			0.001	0.15
height (cm) [mean/sd]	168.9	/	9.1			169.1	/	8.8			169.4	/	9.2			0.177	0.4
BMI (kg/m2) [mean/sd]	24.4	/	4.3			23.7	/	3.6			23.5	/	3.4			1.26e-05	0.249
FEV1 (L) [mean/sd]	3.5	/	0.9			3.6	/	0.8			3.6	/	0.8			0.04	0.103
FEV1/FVC [mean/sd] b	0.79	/	0.09			0.79	/	0.07			0.8	/	0.07			0.352	0.501
FEF25-75 (L/s) [mean/sd] b	3.4	/	1.3			3.4	/	1.2			3.5	/	1.2			0.392	0.181
active smoker (%)	41.7					30.3					30.5					1.15e-06	0.937
ex-smoker (%)	22.7					20.9					22.1					0.768	0.464
pack-years smoked [median/1. /3. Quartile] c	15.7	/	6	/	32.8	13.5	/	4.8	/	26.6	13	/	4.5	/	26	0.01	0.819
Mean annual PM10 exposure (µgram/m3) [mean/sd]	28.8	/	8.9			27.9	/	9.7			27.4	/	9.2			0.001	0.221
FOLLOW-UP CHARACTERISTICS
decline FEV1 (L) [mean/sd]						-0.38	/	0.32			-0.37	/	0.3				0.262
decline FEV1/FVC [mean/sd] b						-0.04	/	0.05			-0.04	/	0.05				0.298
decline FEF25-75 (L/s) [mean/sd] b						-0.76	/	0.71			-0.78	/	0.69				0.48
active smoker (%)						22.8					23.5						0.705
exsmoker (%)						29.8					30.5						0.726
pack-years during follow-up [median/1./3. Quartile] c						3.3	/	0	/	9.8	2.8	/	0	/	9.8		0.581
PM10 exp. during follow-up (µgram/m3*years) [mean/sd]						251.1	/	82.6			247.5	/	78.2				0.29
