# Supplementary material for: Different Genes Interact with Particulate Matter and Tobacco Smoke Exposure in Affecting Lung Function Decline in the General Population
Source: PLoS One. 2012 Jul 6;7(7):e40175. doi: 10.1371/journal.pone.0040175 (PMC3391223; doi:10.1371/journal.pone.0040175)
Supplement: Table S3 — Interaction P-values by lung function decline parameter and exposure for a) all tested pathways and b) genes. (XLS) [file pone.0040175.s005.xls]

## Sheet: P_values for pathways and genes
Table S3 Interaction P-values by lung function decline parameter and exposure for
	a) all tested pathways and b) genes.
a) Pathways
	Exposure to cumulative PM10			Exposure to pack years smoked
Pathway	decline in FEV1	decline in FEV1/FVC	decline in FEF25-75	decline in FEV1	decline in FEV1/FVC	decline in FEF25-75
Apoptosis Signaling	0.705929	0.423158	0.489251	0.0507949	0.124088	0.0828917
Arachidonic Acid Metabolism	0.575342	0.207079	0.305769	0.949005	0.940706	0.9955
Aryl Hydrocarbon Receptor Signaling	0.641636	0.954804	0.995201	0.919008	0.554744	0.687331
Metabolism of Xenobiotics by Cytochrome P450	0.548745	0.887611	0.993601	0.948505	0.887711	0.970903
fMLP Signaling in Neutrophils	0.167483	0.713029	0.356964	0.325567	0.0932907	0.408259
Glutathione Metabolism	0.825418	0.628437	0.571043	0.987501	0.986001	0.9957
IL-6 Signaling	0.640436	0.39836	0.357064	0.357864	0.0893911	0.294371
Methane Metabolism	0.847115	0.0563944	0.0292971	0.480752	0.837216	0.779722
Mitochondrial Dysfunction	0.239276	0.0171983	0.510749	0.519548	0.39506	0.758824
NF-κB Signaling	0.352965	0.421758	0.291871	0.393961	0.305769	0.0826917
Production of Nitric Oxide and Reactive Oxygen Species in macrophages	0.530747	0.334666	0.235076	0.70473	0.259974	0.735127
NRF2-mediated Oxidative Stress Response	0.983402	0.983902	0.976802	0.763824	0.456454	0.979102
Oxidative Phosphorylation	0.467653	0.511649	0.530147	0.888311	0.812619	0.931707
Xenobiotic Metabolism Signaling	0.718028	0.890911	0.918208	0.837616	0.446055	0.883312
b) Genes
	Exposure to cumulative PM10			Exposure to pack years smoked
Gene	decline in FEV1	decline in FEV1/FVC	decline in FEF25-75	decline in FEV1	decline in FEV1/FVC	decline in FEF25-75
AATF	0.21498	0.57844	0.46365	0.34427	0.34737	0.25337
ABCC1	0.91141	0.68813	0.9507	0.75822	0.65783	0.47225
AGT	0.14329	0.83652	0.72383	0.86591	0.76762	0.57344
AGTR1	0.47245	0.44676	0.73413	0.42456	0.71983	0.59864
AKR1A1	0.16918	0.70113	0.37126	0.92851	0.19118	0.63274
AKR7A2	0.69503	0.47625	0.30337	0.32767	0.59314	0.33407
AKR7A3	0.51865	0.41096	0.93061	0.27507	0.32967	0.29357
ALOX12	0.13759	0.012499	0.055594	0.31927	0.19768	0.27647
AOX1	0.61974	0.24358	0.46305	0.044496	0.46115	0.13899
ARNT	0.92661	0.84452	0.87631	0.61454	0.10309	0.39526
ATOX1	0.61874	0.44216	0.18898	0.51155	0.80962	0.33447
BCL2	0.89401	0.68873	0.83522	0.0025997	0.26507	0.19758
BCL2L1	0.69303	0.29277	0.50845	0.57734	0.19008	0.70453
CASP6	0.46395	0.87751	0.82052	0.45415	0.47085	0.039196
CAT	0.86231	0.56974	0.62054	0.51705	0.22498	0.66613
CCL5	0.66643	0.32097	0.11109	0.18578	0.61114	0.72773
CDK1	0.23828	0.9547	0.64214	0.87771	0.64214	0.75762
CDKN1A	0.9538	0.70663	0.59034	0.77992	0.9844	0.76712
CHUK	0.54245	0.034597	0.10219	0.81202	0.26247	0.27357
COL1A1	0.44356	0.25667	0.048795	0.11279	0.44506	0.92041
CP	0.0053995	0.16498	0.051395	0.91351	0.29607	0.31097
CRISP2	0.18598	0.00029997	0.022698	0.63644	0.89221	0.70033
CYBA	0.60204	0.76022	0.82672	0.57584	0.36896	0.67283
CYGB	0.27947	0.79862	0.69853	0.60894	0.56934	0.34067
CYP1A1	0.10619	0.76132	0.79092	0.35776	0.52865	0.75122
CYP1A2	0.028497	0.48205	0.64464	0.44026	0.56884	0.72693
DHCR24	0.41946	0.68133	0.89351	0.16188	0.16978	0.43766
DHRS2	0.56784	0.92541	0.86451	0.47065	0.11579	0.22348
DUSP1	0.87511	0.24818	0.10459	0.73363	0.73103	0.71363
EGFR	0.9824	0.50755	0.82092	0.22048	0.48325	0.36156
EP300	0.33557	0.82182	0.89931	0.09669	0.31067	0.79062
EPHX1	0.13039	0.24498	0.21968	0.28207	0.71183	0.87081
EPHX2	0.9868	0.89281	0.58674	0.60864	0.54915	0.23368
EPX	0.53535	0.040296	0.059794	0.59624	0.37036	0.39596
ERCC1	0.013599	0.0070993	0.014499	0.94541	0.81722	0.78982
FMO2	0.91651	0.24458	0.38686	0.12339	0.55064	0.24758
FOS	0.21218	0.34137	0.40596	0.30157	0.46175	0.40936
FOSL1	0.46695	0.10109	0.40236	0.75652	0.32957	0.64774
GCLC	0.29267	0.71283	0.54155	0.76442	0.65003	0.9583
GCLM	0.11519	0.53185	0.85021	0.65213	0.47125	0.34207
GLRX	0.045795	0.69613	0.31517	0.64774	0.50035	0.69883
GLRX2	0.048095	0.51815	0.9512	0.41786	0.86151	0.68013
GLRX3	0.62944	0.79082	0.67893	0.085391	0.90091	0.85521
GLRX5	0.26827	0.73683	0.52675	0.74133	0.46365	0.81172
GPX1	0.59394	0.053095	0.072193	0.57534	0.49335	0.94371
GPX2	0.23138	0.32977	0.11249	0.54135	0.64884	0.65303
GPX3	0.72303	0.72363	0.12189	0.40606	0.19108	0.82712
GPX4	0.51305	0.28197	0.10049	0.70073	0.77202	0.49925
GPX5	0.18798	0.038996	0.026097	0.31017	0.87991	0.83662
GPX6	0.14849	0.13669	0.16988	0.30617	0.91071	0.88501
GPX7	0.28507	0.82192	0.92971	0.61744	0.9771	0.59784
GPX8	0.44846	0.074693	0.061794	0.91041	0.87781	0.89801
GRB2	0.9598	0.30007	0.69363	0.9791	0.14549	0.13079
GSR	0.89191	0.31937	0.76712	0.40666	0.72553	0.82592
GSS	0.43116	0.82682	0.60624	0.21978	0.14939	0.21868
GSTCD	0.24248	0.72683	0.18748	0.94531	0.71373	0.68613
GSTK1	0.72293	0.48365	0.59544	0.11729	0.9734	0.68543
GSTM1	0.36616	0.41256	0.51335	0.83342	0.59684	0.57484
GSTM2	0.9808	0.12739	0.66203	0.80792	0.85331	0.81412
GSTM3	0.19268	0.74303	0.35846	0.78272	0.54115	0.37416
GSTM4	0.9723	0.14019	0.62674	0.77222	0.83692	0.79602
GSTM5	0.34037	0.65853	0.28897	0.92851	0.52015	0.41426
b) Genes continued…
	Exposure to cumulative PM10			Exposure to pack years smoked
Gene	decline in FEV1	decline in FEV1/FVC	decline in FEF25-75	decline in FEV1	decline in FEV1/FVC	decline in FEF25-75
GSTO1	0.15858	0.79202	0.9936	0.71263	0.19258	0.17948
GSTO2	0.61694	0.76722	0.9709	0.61174	0.17638	0.17058
GSTP1	0.42306	0.85571	0.88471	0.62624	0.35906	0.56774
GSTT1	0.26887	0.13089	0.86731	0.70563	0.50045	0.90201
GSTT2	0.65533	0.25957	0.86291	0.91901	0.66383	0.9702
GSTZ1	0.21778	0.51435	0.79542	0.41846	0.23928	0.28877
HMOX1	0.38386	0.40446	0.84782	0.34277	0.09559	0.42626
HMOX2	0.086991	0.50205	0.12719	0.42666	0.047595	0.21448
HP	0.48625	0.54025	0.91581	0.58594	0.64084	0.49105
IDH1	0.87221	0.10499	0.20708	0.41066	0.82202	0.90741
INSR	0.73523	0.75002	0.38946	0.18398	0.29957	0.12049
JAK2	0.21478	0.93801	0.79982	0.10949	0.16418	0.24548
JUN	0.88981	0.19018	0.22488	0.53765	0.41746	0.23198
KEAP1	0.67373	0.70793	0.40536	0.53245	0.72613	0.76392
LPO	0.28927	0.018098	0.0078992	0.92201	0.82432	0.65833
MAP2K1	0.25277	0.66753	0.34377	0.045995	0.018998	0.051195
MAPK14	0.9654	0.16988	0.36656	0.42476	0.89501	0.9871
MGST1	0.80122	0.74883	0.31797	0.72893	0.42306	0.37276
MGST2	0.24768	0.88791	0.51015	0.64744	0.71783	0.77282
MGST3	0.46155	0.69653	0.32357	0.19188	0.19968	0.41466
MPO	0.40006	0.038596	0.018198	0.94441	0.84912	0.94461
MSRA	0.34767	0.59854	0.55484	0.66923	0.86331	0.64974
MT2A	0.40246	0.58734	0.59964	0.37586	0.58094	0.86251
NAPRT1	0.83362	0.66353	0.29787	0.078892	0.14809	0.15708
NCF2	0.84802	0.12679	0.59374	0.9656	0.50885	0.94991
NDUFA12	0.83292	0.31827	0.31167	0.9799	0.79172	0.26517
NDUFA13	0.055294	0.062694	0.066993	0.34147	0.44406	0.33857
NDUFA6	0.48725	0.80742	0.25807	0.83332	0.43476	0.52115
NDUFS1	0.49655	0.90401	0.93921	0.9785	0.60654	0.92781
NDUFS2	0.9629	0.78142	0.90061	0.56954	0.89831	0.53015
NDUFS3	0.69093	0.40446	0.81642	0.48215	0.29667	0.60054
NDUFS4	0.9614	0.52355	0.28437	0.20358	0.81192	0.69983
NDUFS8	0.81692	0.44056	0.73113	0.9643	0.15378	0.91681
NFE2L2	0.9756	0.51905	0.46555	0.10599	0.48885	0.21918
NFKB1	0.091291	0.29837	0.15938	0.72243	0.022098	0.093491
NOS1	0.74203	0.34557	0.42126	0.33547	0.087691	0.18328
NOS2	0.23458	0.39206	0.85231	0.29347	0.60504	0.51525
NOS3	0.12419	0.66573	0.54735	0.69573	0.50695	0.40136
NOX3	0.11959	0.61334	0.33287	0.067693	0.61994	0.80932
NOX4	0.37186	0.61464	0.51805	0.9709	0.62544	0.59744
NOX5	0.38666	0.39306	0.17648	0.76652	0.94121	0.16858
NOXO1	0.15938	0.82612	0.44296	0.033797	0.069693	0.21658
NQO1	0.77462	0.70843	0.953	0.76742	0.9585	0.89821
NQO2	0.80032	0.94361	0.89321	0.9763	0.80612	0.71543
OGG1	0.93871	0.29877	0.79322	0.86261	0.58214	0.50415
OXR1	0.69163	0.35236	0.76882	0.21938	0.67543	0.045295
PARK2	0.073593	0.065393	0.39276	0.21278	0.51455	0.18418
PARK7	0.9569	0.29907	0.09789	0.46645	0.60124	0.14429
PLA2G4A	0.86211	0.75592	0.77362	0.40716	0.62414	0.70753
PLCB1	0.20858	0.77692	0.82572	0.45025	0.73133	0.44436
PLCG1	0.20158	0.33787	0.35096	0.40416	0.66043	0.80782
PNKP	0.13299	0.20278	0.080692	0.58414	0.85951	0.79232
PPP2CB	0.45655	0.053095	0.09639	0.72813	0.69673	0.25467
PRDX1	0.24618	0.40966	0.42976	0.70293	0.28017	0.53025
PRDX2	0.34047	0.19208	0.30437	0.64754	0.74243	0.15248
PRDX3	0.009899	0.44876	0.33777	0.60664	0.65483	0.94081
PRDX5	0.60564	0.55624	0.61734	0.48855	0.25527	0.24618
PRDX6	0.51255	0.61884	0.94321	0.87471	0.67073	0.70863
PRKCA	0.77402	0.48195	0.059894	0.94961	0.30647	0.35496
PSEN1	0.34747	0.27297	0.32957	0.022598	0.71503	0.086991
PSMB5	0.038296	0.28057	0.27017	0.52175	0.0029997	0.13769
b) Genes continued…
	Exposure to cumulative PM10			Exposure to pack years smoked
Gene	decline in FEV1	decline in FEV1/FVC	decline in FEF25-75	decline in FEV1	decline in FEV1/FVC	decline in FEF25-75
PTGS1	0.18398	0.88261	0.36576	0.14589	0.43766	0.55524
PTGS2	0.16658	0.19108	0.51025	0.50785	0.77612	0.78582
PTK2B	0.19968	0.88481	0.56724	0.016898	0.24918	0.032797
PXDN	0.74093	0.56704	0.17478	0.82112	0.77552	0.79582
PYCR1	0.71353	0.60544	0.55434	0.064394	0.53815	0.33997
RAC1	0.026997	0.16438	0.090891	0.60364	0.37056	0.24288
RAC2	0.42296	0.47335	0.059394	0.81402	0.85731	0.80742
RELA	0.51565	0.83822	0.65533	0.86671	0.22138	0.46125
RIPK1	0.84312	0.18578	0.23798	0.11659	0.40996	0.067293
SCARA3	0.87511	0.81332	0.64494	0.35656	0.85931	0.18678
SEPP1	0.32467	0.63854	0.60364	0.61934	0.21588	0.18228
SLC23A2	0.61234	0.080992	0.022498	0.80452	0.68953	0.30937
SNCA	0.61374	0.00039996	0.025497	0.71873	0.71033	0.39586
SOD1	0.81262	0.46825	0.72813	0.19338	0.87101	0.79672
SOD2	0.16378	0.55664	0.59574	0.059594	0.015098	0.57804
SOD3	0.64404	0.79032	0.55514	0.89671	0.89201	0.9637
SRXN1	0.80032	0.36096	0.53195	0.66023	0.22198	0.19458
STAT1	0.91151	0.52525	0.11949	0.40766	0.30147	0.91701
STK25	0.53965	0.11479	0.26777	0.21818	0.31687	0.63054
TGFBR2	0.53895	0.67553	0.27477	0.11399	0.13499	0.0058994
TLR4	0.67793	0.42626	0.38276	0.31457	0.87241	0.32647
TP53	0.56494	0.76432	0.93471	0.9642	0.75402	0.033097
TPO	0.37196	0.51405	0.91221	0.051595	0.64274	0.25727
TXN	0.88621	0.61184	0.32327	0.81372	0.50415	0.48855
TXN2	0.17948	0.25847	0.30297	0.80142	0.34947	0.9868
TXNIP	0.23828	0.9958	0.67813	0.57134	0.68273	0.78362
TXNRD1	0.63904	0.74253	0.80632	0.23918	0.53685	0.16398
TXNRD2	0.35916	0.32357	0.22088	0.85541	0.47115	0.047095
UCP2	0.37346	0.36076	0.89921	0.84142	0.18598	0.33017
